# Supplementary material for: Correlation Between D-Dimer Concentrations and Thromboelastography in Dogs With Critical Illness: A Retrospective, Cross-Sectional Study
Source: Frontiers journal article supplement (doi:10.3389/fvets.2022.844022), 2022-04-14
Supplement: Table_1.XLS [file Table_1.XLS]

## Sheet: supplementary table
Cogulation index (CI)	Dx group	No.	Date	Species	Breed	Age	Gender	Diagnosis	PLT (K/μL)	D-dimer (ng/mL)	R time (min)	K time (min)	Angle (degree)	MA (mm)	LY 30 (%)	Cogulation index (4<)
CI 4<	Inflammatory/Tumor	1	2020-04-07	Canine	Yorkshire terrier	9y	S.F	Rt. adrenal cortical carcinoma with metastasis, GB mucocele, Post-operative peritonitis	477	74.29	2	2.1	63.6	62.9	0	4.11991
		2	2020-04-20	Canine	Shiba Inu	5y	C.M	Multilobular tumor of bone,	435	83.17	3.8	1.1	73.8	75.9	1.7	6.23725
		3	2020-08-24	Canine	Jindo dog	6y	C.M	Gastroduodenal inflammation (drug-induced)	232	94.4	2.8	0.8	77.6	78.4	0	6.43396
		4	5/28/20	Canine	Mixed	11y	I.F	Hyperadrenocorticism, Bacterial cystitis, Renolithiasis (bilateral kidney), Multiple hepatic cysts	784	110.87	3.7	1	76.9	76.1	3.5	6.18245
		5	2021-06-02	Canine	Maltese	10y	S.F	Chronic pancreatitis, Hyperadrenocorticism	749	169.01	1.2	0.8	83.6	77.2	1.2	5.89444
		6	2021-06-22	Canine	Poodle	13y	I.M	Acute pancreatitis, AKI grade II of IV, Renolithiasis, Hypothyroidism, Early stage mucocele	681	173.88	3.1	0.8	80.7	74.3	7.1	5.71751
		7	2020-05-07	Canine	English cocker spaniel	16y	S.F	GB mucocele, Osteosarcoma, Melanoma	530	423.51	1.7	0.8	82.5	73.2	3.9	5.3203
		8	2020-04-22	Canine	ShihTzu	13y	S.F	Renal cell carcinoma (Lt. tumor stage I of V, T3N0M0), Adrenal tumor (Rt.)	556	514.69	1.9	1.4	71.3	64.1	0	4.11423
		9	2020-06-22	Canine	Papillon	11y	S.F	Liposarcoma (De-differentiated, completed, Stage I (T2, N0M0)), Renolithiasis, Lipoma	143	738.79	2	1.1	74	66.1	0.4	4.38967
		10	2021-06-03	Canine	Pomeranian	3y	I.F	Non-erosive polyarthritis, superficial pyoderma, Malassezial dermatitis, IMPA, Acetaminophen toxicosis	342	1114.94	1.9	0.8	78.9	80.7	1.3	6.67285
		11	2020-06-30	Canine	Mixed	10y	C.M	Cervical neuroendocrine carcinoma (presumptive thyroid carcinoma), Acquired megaesophagus	319	1176.88	4.2	1.3	70.6	71.9	0	5.70329
		12	2020-12-09	Canine	Pomeranian	16y	S.F	acute kidney injury, MGT, Urolithiasis (Lt.kidney)	447	1217.1	1.2	0.8	78.6	74	0	5.48534
		13	2020-08-13	Canine	Maltese	10y	C.M	Steroid induced hepatopathy	365	1260.72	2.2	0.8	78.8	79.6	0.3	6.53002
		14	2020-05-05	Canine	Pomeranian	5y	C.M	Inflammatory bowel disease, Alopecia X, Superficial pyoderma, Sebaceous epithelioma, Pneumonia	399	2195.02	3.6	1	76	78.5	0	6.58907
		15	2021-03-03	Canine	Pekingese	18y	S.F	Bacterial cystitis (Relapse/reinfection), Chronic pancreatitis, Cholecystitis / Cholelithiasis, Rt. Adrenal mass (incidentaloma), UB mass, Chronic kidney disease (IRIS stage IV of IV, Normotensive, Proteinuric) with bilateral renal calculi & Renal cysts	328	2217.23	4.6	1.2	75.2	80.2	1.9	7.01424
		16	2021-01-26	Canine	Yorkshire terrier	11y	C.M	Hyperadrenocorticism	455	2552.03	1.3	0.9	77.1	66.3	1.7	4.26033
		17	2020-04-28	Canine	Boston terrier	8y	C.M	Splenic hemangiosarcoma (Stage III, T3N0M1)	388	2573.67	1.5	1.3	73	66.9	0.1	4.48666
		18	2020-05-12	Canine	A.Cocker spaniel	9y	I.M	Tonsilar SCC stage IV/IV (T3N2bM0)	369	3733.84	1.4	0.8	82	81.1	0	6.60299
		19	2020-10-29	Canine	Shihtzu	13y	S.F	Colitis, Urolithiasis, Hepatic mass	1442	4294.72	6.2	1.1	75.6	79.6	3.6	7.1007
		20	2020-09-15	Canine	Maltese	10y	I.M	IMHA	259	8069.09	2.1	0.8	81	82.2	0	6.89503
		21	2/22/21	Canine	Mixed	9y	S.F	Acute Pancreatitis	145	9668.85	3.7	1.8	63.4	64	1.1	4.51261
		22	2021-04-28	Canine	Maltese	10y	C.M	Hepatocellular carcinoma (T1bN0M0, Stage1B), Hepatic cysts, Splenic nodular hyperplasia	713	UNDER	1.9	1.4	72	70.8	0	5.20621
		23	2/18/21	Canine	Cocker spaniel	12y	S.F	Splenic stromal sarcoma (T3N0M1, Stage III), Chronic pancreatitis	852	UNDER	3.4	0.8	76.9	71.9	0.2	5.4487
		24	5/26/20	Canine	Yorkshire terrier	12y	C.M	Nasal foreign body, Chronic pancreatitis, hepatic nodular hyperplasia, GB mucocele	499	UNDER	3.2	1.1	73	72.4	0.5	5.60366
		25	2021-04-08	Canine	Poodle	10y	S.F	Hyperadrenocorticism, Renolithiasis, Spondylosis deformans (L5-6), GB mucocele, Splenic nodular hyperplasia	736	UNDER	1.8	0.8	80.2	70.2	4.4	4.8915
	Hemodynamic compromise	1	2020-04-14	Canine	Poodle	10y	C.M	MMVD ACVIM stage B2 (Lt.CHF ISACHC class lb)	373	76.3	2.5	2.2	62.7	62	0	4.05492
		2	2021-06-15	Canine	Poodle	11y	S.F	MMVD ACVIM stage B2 w/ pCTR (ISACHC class Ib), Mild pulmonary hypertension	318	178.41	2.2	0.9	76	68.7	4	4.79447
		3	2020-06-18	Canine	Poodle	10y	S.F	MMVD ACVIM stage Cc (ISACHC class IIIa)	196	397	3.3	1.7	67	65.3	0	4.591
		4	2021-05-14	Canine	Maltese	11y	C.M	MMVD ACVIM stage B1 (ISACHC class Ia)	291	922.79	4.9	1.6	66.8	63.1	0.1	4.42712
		5	2020-12-24	Canine	Maltese	12y	C.M	MMVD ACVIM stage B1	677	1304.63	1.4	0.8	83.1	83.2	0	6.92403
		6	2021-05-13	Canine	Poodle	11y	C.M	MMVD ACVIM stage Cc (ISACHC class II), Bronchial collapse (mild, dynamic)	287	2298.02	1.2	0.9	78.8	67.2	1.3	4.35604
		7	2021-01-19	Canine	Mixed	12y	C.M	MMVD ACVIM stage B2 (ISACHC class Ia), Soft palate elongation	435	4204.62	1.5	1.3	71.4	69	0	4.87277
		8	2020-06-09	Canine	ShihTzu	13y	C.M	MMVD ACVIM stage B2 (ISACHC class 1b)	345	UNDER	2.1	1.1	73.3	65	0	4.23676
		9	2020-04-21	Canine	Maltese	13y	C.M	MMVD ACVIM stage B2 (Lt.CHF ISACHC class lI), Bilateral hip joint DJD	458	UNDER	3.6	0.8	76.4	73.9	0.3	5.81629
		10	2021-04-27	Canine	Maltese	9y	C.M	MMVD ACVIM stage B1, Pulmonary hypertension	658	UNDER	2.8	0.9	75.4	71.8	0.5	5.3956
		11	2020-12-29	Canine	Maltese	14y	C.M	MMVD ACVIM stage B1 (ISACHC class la)	498	UNDER	3.2	1.1	74.1	73.2	1.5	5.70955
	Inflammatory/Tumor with hemodynamic compromise	1	2021-04-13	Canine	Welsh corgis	7y	I.M	Heartworm disease (Class IV, Caval syndrome), Systolic pulmonary artery hypertension	555	74.97	1.7	1	75.3	69	0.1	4.80056
		2	2021-03-30	Canine	Mixed	2y	I.F	Heartworm infection (Class 1), Pulmonary arterial hypertension	420	140.86	2.6	1	74.6	71.8	0	5.39126
		3	2020-12-28	Canine	Pomeranian	15y	I.F.	MMVD ACVIM stage B2, Pyometra	471	191.36	1.2	0.8	83	81.4	0	6.604
		4	2021-01-14	Canine	Maltese	13y	C.M	MMVD ACVIM stage B1, CKD IRIS stage II/IV (normotensive, proteinuric), Splenic neoplasia	344	927.77	2.2	0.8	79.5	75.6	0.9	5.85115
		5	2021-05-06	Canine	Maltese	11y	C.M	Multicentric lymphoma (Clinical stage V, Substage a), MMVD ACVIM stage B1, ISACHC class Ia, Cholelithiasis, Choledocholithiasis	218	3377.32	3	0.9	74.6	67.4	1	4.71122
		6	2020-09-22	Canine	Pekingese	7y	S.F	Multicentric lymphoma WHO stage IIIa, MMVD ACVIM stage B1	447	OVER	0.9	0.8	79.5	66.5	1.1	4.18559
		7	2021-05-11	Canine	Shihtzu	10y	S.F	Hyperadrenocorticism, Brachycephalic syndrome (Soft palate thickening), Nasopharyngeal collapse (partial), Sialocele, sialolithiasis, Renolithiasis (bilateral), CKD IRIS stage I of IV (severely hypertensive, proteinuria), MMVD ACVIM stage B1, Cholelithiasis, GB sludge	258	UNDER	2.8	0.8	77	78.6	0.1	6.48152
		8	2020-12-01	Canine	Maltese	11y	C.M	UB Transitional cell carcinoma, Stage II (T2N0M0), MMVD ACVIM stage B1	602	UNDER	1.4	0.8	80.7	76.3	0.7	5.83992
CI 4>	N.A.	1	2/25/21	Canine	Poodle	12y	S.F	Hyperadrenocorticism, Hepatic mass, Splenic mass, CKD with Renolithiasis and cyst (IRIS stage I of IV, NP, Normotensive), Cystitis	316	UNDER	1.4	1.2	74.9	56	1	2.62373
		2	2020-05-12	Canine	French bulldog	10y	C.M	Splenic hemangiosarcoma (T2N2M1/Clinical stage 3), CKD IRIS stage 1 (NP, normotensive), Urolithiasis (Rt.kidney), Atopic dermatitis	164	4800	2.2	2.8	56.9	53.8	0	2.80631
		3	2021-01-27	Canine	Shihtzu	18y	C.M	Atypical hyperadrenocorticism, CKD IRIS stage I of IV (prehypertensive, proteinuric), Pheochromocytoma	353	UNDER	1.1	1.7	71.4	57.5	0	2.92412
		4	2020-06-10	Canine	Pomeranian	10y	S.F	Mixed hepatocellular carcinoma and biliary carcinoma, Mammary gland adenoma, Bronchial collapse, CKD IRIS stage I of IV (nonproteinuric, AP-0)	133	1164.7	2.1	1.5	68.8	58	0.5	3.19039
		5	2020-09-01	Canine	Great Pyrenees	8y	C.M	Hemangiosarcoma (T3N0M0, Stage II, Completed)	240	1824.48	1.1	1.2	76.6	60.5	0.1	3.2907
		6	2021-01-19	Canine	Yorkshire terrier	6y	C.M	Transitional cell carcinoma, Urolithiasis, Tracheal collapse, Bronchial collapse	411	1210.66	0.9	1.5	71.1	59.7	0.3	3.26907
		7	2020-05-12	Canine	Maltese	12y	S.F	Intracranial hemorrhage, Intracranial tumor, Chiari-like malformation (COMS), Syringomyelia, cervical IVDD, MMVD ACVIM stage B1 (ISACHC stage I)	727	946.36	1.6	0.8	80.2	61.7	4.8	3.46021
		8	2020-06-11	Canine	Maltese	5y	C.M	Brain tumor, Chiari-like malformation, Urolithiasis (bilateral kidney)	742	UNDER	2.8	1.2	72.3	59.8	5.8	3.48707
		9	2020-10-08	Canine	Maltese	5y	C.M	Renal cell carcinoma, CKD IRIS stage I of IV (pre-hypertensive, non-proteinuric)	321	UNDER	3	1	74.7	62.5	4.4	3.89878
		10	2021-03-02	Canine	Pekingese	8y	S.F	Cor pulmonale: Systolic PAH (moderate, 61mmHg), MMVD ACVIM stage B1, Brachycephalic airway syndrome, Spondylosis deformans	193	1319	1.3	1.9	66.6	56.9	0	2.96688
		11	2021-05-03	Canine	Yotkshire terrier	10y	S.F	Rt adrenal cortical carcinoma with metastasis, Tracheal collpase grade II of IV, CKD IRIS stage I of IV (P, normotension)	263	457.87	4.8	3.1	51.9	57.3	0	3.82784
		12	2021-05-04	Canine	Maltese	11y	S.F	Multicentric lymphoma (Clinical stage IV, Substage a), MMVD ACVIM stage B1, Lt. renolithiasis, CKD IRIS stage II/IV (non-proteinuric)	299	2250.05	3.6	1.8	64.6	58.5	0.9	3.56117
		13	2021-05-18	Canine	Bichon Frise	5y	I.F	Ventricular septal defect (perimembranous inlet, R to L flow), Pulmonic stenosis (Valvular, type A), Systolic & diastolic pulmonary artery hypertension (severe), MMVD ACVIM stage Cc (ISACHC stage II), Rt. CHF, CKD IRIS stage I of IV	482	3361.69	3.1	2.8	56	49.3	2.4	2.19368
		14	2021-06-08	Canine	Shetland Sheepdog	8y	C.M	MMVD ACVIM stage B1, Chronic pancreatitis, GB Sludge, Pectus excavatum	354	159	1.8	0.9	77.2	62.9	8.4	3.75657
		15	2021-06-17	Canine	Maltese	14y	C.M	MMVD ACVIM stage Cc (ISACHC stage IIIa), Dynamic tracheal collpase IV/IV (thoracic trachea, carina region), Broncheal collapse (complete), Chronic bronchitits, Addison disease, Hypothyroidism, bilateral Hip joint DJD	629	3925.97	2.2	0.8	79.1	64.1	4.4	3.95754
